# Supplementary material for: Visualizing the structure and motion of the long noncoding RNA HOTAIR
Source: PubMed Central journal article supplement — RNA. 2020 May;26(5):629–36. doi: 10.1261/rna.074633.120 (PMC7161352; doi:10.1261/rna.074633.120), 2020-05
Supplement: supp_074633.120_Supplemental_Material__.pdf [file supp_074633.120_Supplemental_Material__.pdf]

## Supplementary Material

**Movie S1:** <https://drive.google.com/open?id=0B-CNvwEZiM3rMI9WcnQ1dIZnbU0>  
**Movie S2:** <https://drive.google.com/open?id=0B-CNvwEZiM3rOHZFbVJkNEhUeFU>  
**Movie S3:** <https://drive.google.com/open?id=0B-CNvwEZiM3rXy16UWs5cVJTSEk>  
**Movie S4:** <https://drive.google.com/open?id=0B-CNvwEZiM3rYIIZQVNSa2Z1dkk>  
**Movie S5:** <https://drive.google.com/open?id=0B-CNvwEZiM3rS25XWTIPTTJNbm8>  
**Movie S6:** <https://drive.google.com/open?id=0B-CNvwEZiM3rRFkyVThnb1hreXM>  
**Movie S7:** <https://drive.google.com/open?id=0B-CNvwEZiM3rc3dEdjlkN1cwc1E>  
**Movie S8:** <https://drive.google.com/open?id=0B-CNvwEZiM3rSGd2M2xOck1LaEU>  
**Movie S9:** <https://drive.google.com/open?id=0B-CNvwEZiM3rWW1IQm5kOWMwOUU>  
**Movie S10:** <https://drive.google.com/open?id=0B-CNvwEZiM3rMkxOZFIUc0JkZWc>  
**Movie S11:** <https://drive.google.com/open?id=0B-CNvwEZiM3rYWJFMzBFc2EwRzA>  
**Movie S12:** <https://drive.google.com/open?id=0B-CNvwEZiM3rSVhyVjJsdm5Vb3c>

**Supplementary note 1:** In-vitro transcription

**Supplementary note 2:** RNA-seq

**Supplementary note 3:** AFM

**Supplementary note 4:** Cryo-EM

**Supplementary note 5:** Random RNA control

**Supplementary note 6:** AFM of HOTAIR functional modules

**Supplementary note 7:** DNA synthesis

**Supplementary note 8:** Molecular measurements and modeling

**Supplementary note 9:** Triplexator predictions and CD spectroscopy

**Supplementary note 10:** RNA joint analysis

**Supplementary note 11:** Analysis of computational predictions

## Supplementary note 1: In-vitro transcription

>HOTAIR

```
GACUCGCCUGUCUCUGGAGCUUGAUCCGAAAGCUUCCACAGUGAGGACUGCUCCGUGGGGGUAA
GAGAGCACCAGGCACUGAGGCCUGGGAGUCCACAGACCAACACCCUUGCUCUGGCGGCUCCACCCGG
GGCUUAGACCCUCAGGUCCCUAAUAUCCCGGAGGUGCUCUCAUCAGAAAGGUCCUGCUCCGCUUCGCAG
UGGAAUUGAACGGAUUUAGAAGCCUGCAGUAGGGGAGUGGGGAGUGGAGAGAGGGAGCCCAGAGUUACAG
ACGGCGGCAGAGGAAGGAGGGGCGUCUUUUAUUUUUUUAAGGCCCAAAGAGUCUGAUGUUUACAAGACC
AGAAUUGCCACGGCCGCGUCCUGGCAGAGAAAAGGCUGAAUUGGAGGACCGGCGCCUUCUUUAUAAGUUA
GCACAUUGGCGAGAGAAUUAAGUGCUGCAACCUAAACCAGCAAUACACCCAAGCUCGUUGGGGCCUAAG
CCAGUACCGACCUGGUAGAAAAAGCAACCACGAAGCUAGAGAGAGAGCCAGAGGAGGGAAGAGAGCGCCA
GACGAAGGUGAAAGCGAACCACGCAGAGAAUUGCAGGCAAGGGAGCAAGGCGGCAGUUCGCCGAACAAAC
GUGGCAGAGGGCAAGACGGGCACUCACAGACAGAGUUUAUGUAUUUUUAUUUUUUAAAAUCUGAUUJGG
UGUUCUAGAGGAAAAGGGAAAUCUAGGGAACGGGAGUACAGAGAGAAUAAUCCGGGUCCUAGCUCGCC
ACAUGAACGCCAGAGAACGCUGGAAAAACUGAGCGGGUGCCGGGGCAGCACCCGGCUCGGGUCAGCCA
CUGCCCCACACCGGGCCACCAAGCCCCGCCUCGCGGCCACCGGGGCUUCCUUGCUCUUCUUAUCAUC
UCCAUCUUUAUGAUGAGGCUUGUUAACAAGACCAGAGAGCUGGCCAAGCACCUCUAUCUCAGCCGCGCCC
GCUCAGCCGAGCAGCGGUCGGUGGGGGGACUGGGAGGCGCUAAUUAUUUGAUUCCUJUGGACUGUAAAAU
AUGGCGGCUCUACACGGAACCCAUGGACUCAAAAACAUAUAUCUGUJUGGGCGUGAGUGCACUGUCUCU
CAAAUAAUUUUUCCAUAAGGCAAUUGUCAGAGGGUUCUGGAUUUUUAGUJUGCUAAGGAAAGAUCCAAUUGG
GACCAAUUUUAGGAGGCCCAAACAGAGUCCGUUCAGUGUCAGAAAAUGCUUCCCAAAGGGUUGGCAGUG
UGUUUUGUJUGGAAAAAGCUUGGGUUUAJAGGAAAGCCUUUCCUGCUACUUGUGUAGACCCAGCCCAAUU
UAAGAAUUAACAAGGAAGCGAAGGGUJUGUGUAGGCCGGAAGCCUCUCUGUCCCGGCUGGAUGCAGGGGAC
UUGAGCUGCUCCGGAUUJUGAGAGGAACAUAGAAGCAAAGGUCCAGCCUUUGCUUCGUGCUGAUUCCUAG
ACUUAAGAUUCAAAAACAUAUUUUUAAAAGUGAAACCAGCCCUAGCCUUJUGGAAGCUCUUGAAGGUUCAG
CACCCACCCAGGAAUCCACCUGCCUGUUACACGCCUCUCCAAGACACAGUGGCACCGCUUUUCUAAACUGG
CAGCACAGAGCAACUCUAUAUAUAGCUUAUAUUAGGUCUAGAAGAAUGCAUCUUGAGACACAUGGGUAAC
CUAAUUAUAUAUAGCUUJGUUCCAUAACAGGAGUGAUUAUGCAGUGGGACCCUGCUGCAAACGGGACUUJGC
ACUCUAAAUAUAGGCCCCAGCUUGGGACAAAAGUJGCAGUAGAAAAUAGACAUAGGAGAACACUUAUUU
AAGUGAUGCAUGUAGACACAGAAGGGGUUUUAAAAGACAGAAAUAUAAGAAGUACAGAAGAACAGAAAA
AAAAUCAGCAGAUGGAGAUUACCAUUCCAAUGCCUGAACUCCUCCUGCUAUUAAGAUJUGCUAGAGAAU
UGUGUCUUAACAGUUCUUGAACCCAGAAGAACGCAAUUUCAAUGUAUUUAGUACACACACAGUAUGUAU
AUAACACAACUCACAGAAUAUAUUUCCAUAACAUJGGGUAGGUAUGCACUUUGUGUAUAUAUAUAUUAUG
UAUUUCCAUGCAGUUUUAAAAGUAGUAUAUAUAUAUCUGGAUGCAUUUUCAAAAAA
```

pLZRS-HOTAIR and pCDNA3-HOTAIR were a kind gift from Prof. Howard Chang. pJ-HOTAIR was purchased from DNA2.0. All plasmids were fully sequenced to ensure accuracy. To produce HOTAIR transcripts for in vitro transcription (IVT), DNA templates were either plasmids linearized with EcoRI restriction enzyme (NEB), or PCR amplicons. PCR primers for the amplification of DNA templates for IVT were synthesized by Integrated DNA Technologies and HPLC-purified.

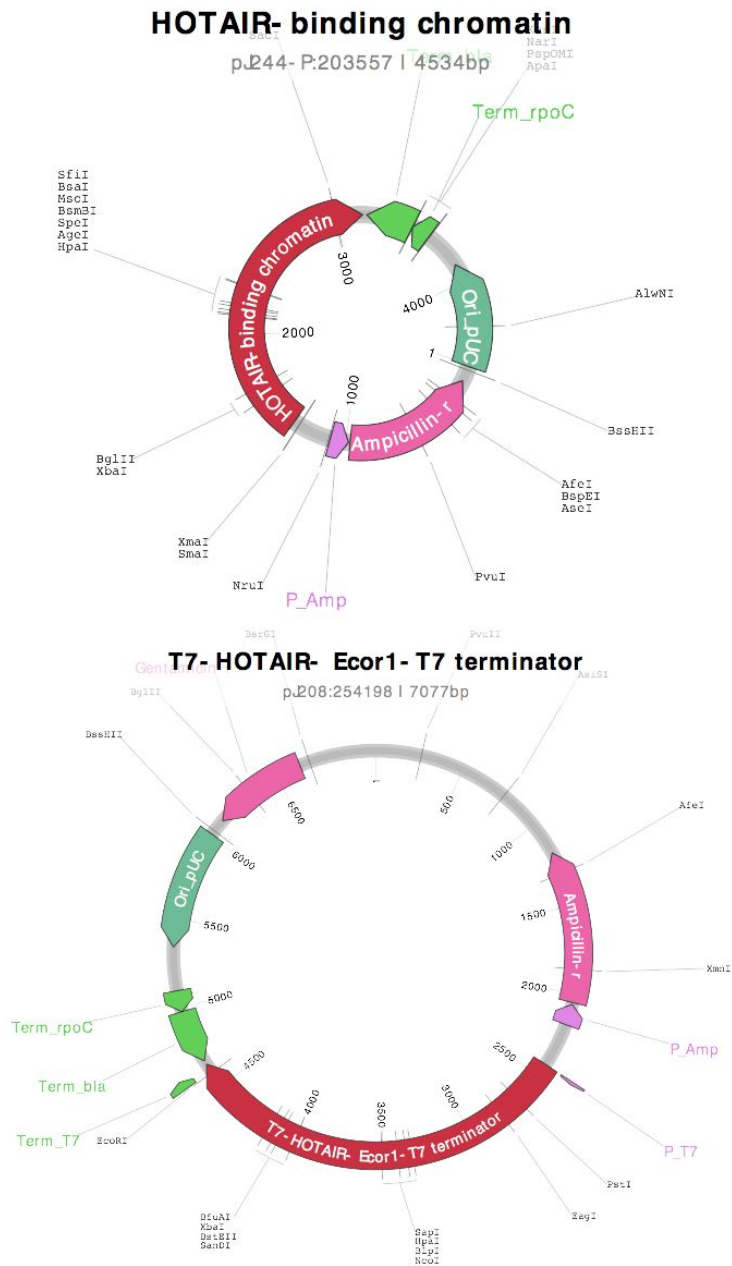

**Figure S1.** plasmid maps

DNA templates for IVT of whole HOTAIR, HOTAIR-300, HOTAIR-1200, and HOTAIR-658 RNA, were amplified using the following primers:

>HOTAIR\_Fwd

TAATACGACTCACTATAGGG

HOTAIR\_Rev

TTTTTTTTTTGAAATGCATCCAGATATTAATATAT

>HOTAIR300\_Fwd

```

TAATACGACTCACTATAGGG
  >HOTAIR300_Rev
CGCCCTCCTTCTCTCGC
  >HOTAIR1200_Fwd
GAGTACTAATACGACTCACTATAGGGATGGAGTACTAATACGACTCACTATAGGGATGTCTTTATTTTTT
  TAAGGCCCAAAGAG
  >HOTAIR1200_Rev
TTTCACTTTTAAAAATTTGTTTTTGAATCTTAAGTCTAGGAATCAGCACGAAG
  >HOTAIR658_Fwd
GAGTACTAATACGACTCACTATAGGGATGGCCTTTGCTTCGTGCTGATT
  >HOTAIR658_Rev
TTTTTTTTTTTGAAAATGCATCCAGATATTAATATATCTACATTTTAAAACATGCATGGAAAATAC

```

DNA templates for IVT were generated by PCR with high-fidelity DNA polymerase (KAPA HiFi HotStart PCR Kit, Kappa Biosystems). All products were confirmed by agarose gel electrophoresis before IVT. IVT was carried out using two separate kits (from New England Biolabs and Megascript). IVT was carried out for 3 h at 37 °C and followed by DNA template digestion (using DNase included in the kits). RNA was purified using MegaClear kit. Elution was carried out with ultrapure RNase free water in 37 °C. Samples were then diluted into nuclear-like buffer for imaging or further analysis (see **Supplementary note 3**). All products were confirmed by agarose gel electrophoresis.

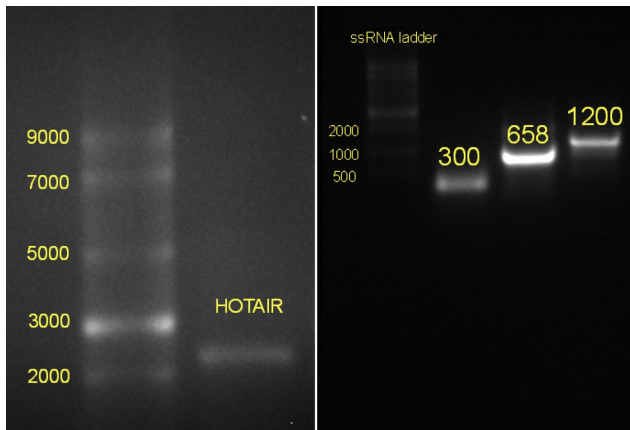

**Figure S2.** Gel electrophoresis of IVT products. Left, HOTAIR. Right, HOTAIR domains (300 nt, 658 nt, 1200 nt from left to right).

## Supplementary note 2: RNA-seq

RNA-seq was performed at the Nancy and Stephen Grand Israel National Center for Personalized Medicine (G-INCPM) at the Weizmann Institute of Science. Library preparation was done using in-house protocols. Briefly, purified RNA samples from IVT of whole HOTAIR and HOTAIR-300 were fragmented and used as templates for cDNA generation. Then, end repair, a base addition, adapter ligation, and PCR amplification were performed. Quality of libraries was evaluated by Qubit and TapeStation. Sequencing library was constructed with barcodes to allow multiplexing of two samples from two bands in one run. 700,000-900,000 paired end 150x2 reads were sequenced on Illumina MiSeq. Next, reads were mapped to a human reference genome, GRCh38, using BWA-MEM v0.75<sup>1</sup> with default parameters and coverage was calculated using Samtools v0.19 mpileup<sup>2</sup>. Analysis showed that both HOTAIR and HOTAIR-300 fully map to CRCh38.

**Figure S3 (next page).** RNA-seq results mapping HOTAIR to the HOTAIR gene. Upper track indicates the coverage, i.e. number of reads, that cover HOTAIR's genomic loci. Gray - a read pair has a reasonable insert size. Red - a read pair far from each other (ie on two different 'exons'). Blue- insert size too small. Green-inverted orientation of read pairs.

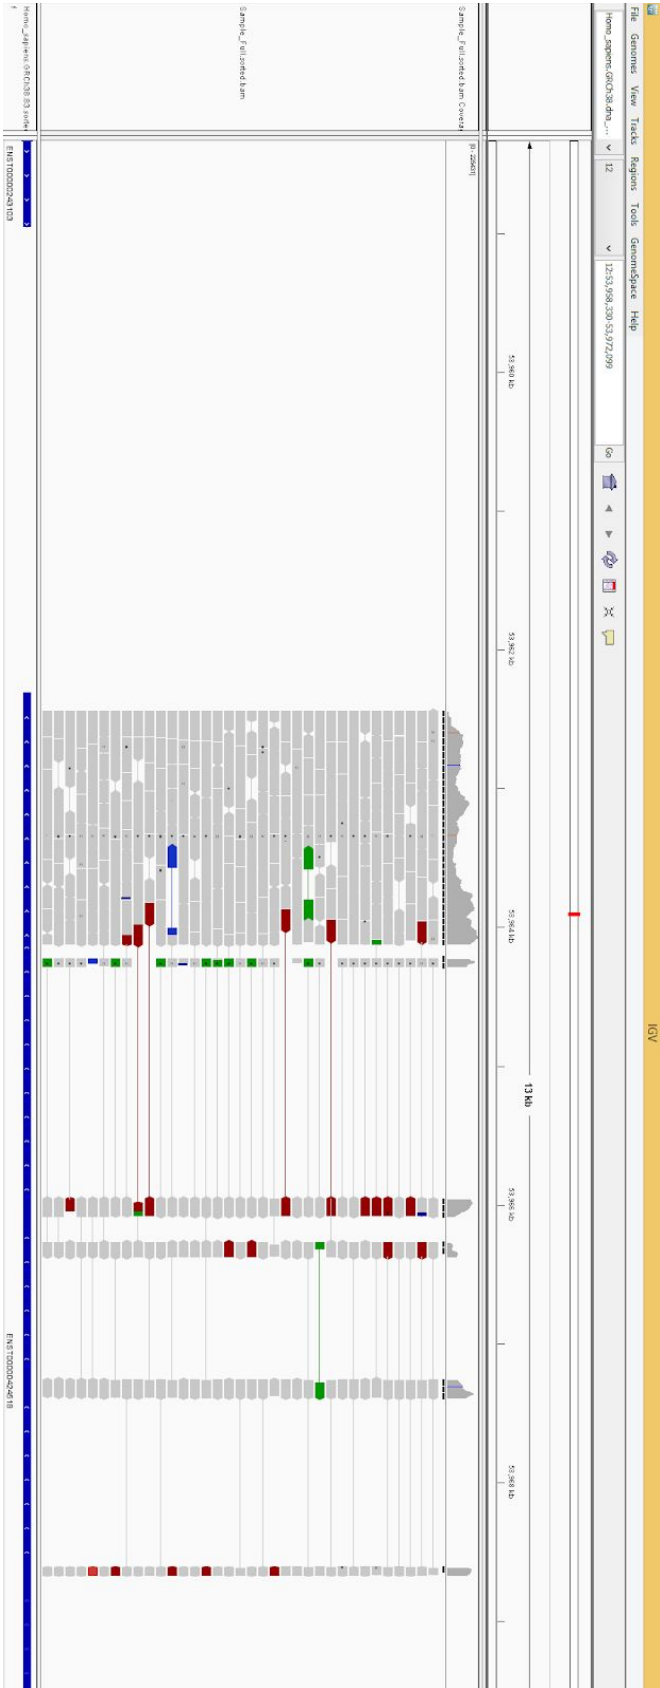

### Supplementary note 3: AFM

Mica discs ( $\varnothing$  8 mm, Ted Pela (1x3" sheets, Grade V1, Product Nr. 56)) were glued to a microscope slide. Immediately before use, the mica substrates were cleaved to produce atomically flat surfaces suitable for high-resolution imaging. 50  $\mu$ L of 0.01%, sterile-filtered PLO (Poly-L-ornithine) solution (Sigma) was deposited on the mica for 10 minutes and then removed with a pipette and blow dried with N<sub>2</sub> stream. Plastic rings were sonicated for 10 minutes, cleaned with ethanol and glued to the slide. Prior to deposition on substrate, RNA and HBDs molecules were incubated in filtered NLB (Nuclear-Like Buffer: 5mM NaCl, 140mM K<sup>+</sup>, 0.5 mM Mg<sup>+2</sup>, 10<sup>-4</sup> mM Ca<sup>+2</sup>, pH=7.2) for 30 min at 37 °C. 20 $\mu$ L of the investigate sample were deposited on the PLO- coated mica for 90-120 seconds and then removed with a pipette. 40 $\mu$ L of NLB were used to rinse the mica, and the chamber was gently filled with 1mL of NLB.

Samples were analysed using a NanoWizard® ULTRA Speed AFM (JPK Instruments, Germany) mounted on an inverted optical microscope (Nikon Eclipse TE2000-U or Zeiss AxioObserver.A1), or equipped with a JPK TopViewOptics™. Samples were imaged in buffer at ambient temperature in amplitude-modulation or phase-modulation AC mode. Fast-scanning high-resonant ultra-short cantilevers (USC-F0.3-k0.3, NanoWorld, Switzerland) with a nominal resonance frequency of 300 kHz in air, spring constant of 0.3 N/m, reflective chromium/gold-coated silicon chip, and high-density carbon tips with a radius of curvature of 10 nm were used.

For the DNA origami squares measurements, 0.5 nM samples in 1xTAE, 12.5 mM MgCl<sub>2</sub> were deposited on freshly cleaved mica (as described above) for 15 minutes, washed and scanned via JPK Nanowizard III Bio-AFM (HyperDrive and AC modes using ultra-short cantilevers with force constant of 0.3 N/m). Images were analyzed using Nanoscope analysis v1.5 and JPK Data Processing v4.3.26..

Image processing was done by FIJI. Fig. 2D is a 3D surface plot of Fig. 2E (right panel), using the FIJI 3D surface plot function. No additional processing was made on the image. The following 3D surface plot parameters: Grid size 1024, Smoothing 12.0, Lighting 0.22, Fire LUT, Z-scale 0.10, Min 0%, Max 100%. Link to the original image file:

<https://drive.google.com/open?id=0B1AS1gHBwUrRZGgtbUotTzRBR2M>

#### Supplementary note 4: Cryo-EM

Cryo-EM was performed at the Weizmann Institute of Science by standard in-house protocols. Briefly, 3.5  $\mu\text{L}$  of HOTAIR solution (1.5 mg/ml) was applied to glow-discharged Quantifoil holey carbon grids (R1.2/1.3, 300 mesh). Grids were plunge-frozen in liquid ethane cooled by liquid nitrogen, using a Leica EM-GP plunger (4 s blotting time, 80% humidity). Grids were imaged at liquid nitrogen temperature on an FEI Tecnai TF20 electron microscope operated at 200 kV with a Gatan side entry 626 cryo-holder. Images were recorded on a K2 Summit direct detector (Gatan) mounted at the end of a GIF Quantum energy filter (Gatan). Images were collected in counting mode, at a calibrated magnification of 16,218 yielding a pixel size of 3.083 Å. The dose rate was set to 8.5 electrons per physical pixel per second and a total exposure time of 8 s. Each image was fractionated into 40 subframes of 0.2 s. Defocus range was 1.5-3.5  $\mu\text{m}$ . All dose-fractionated images were recorded using an automated low dose procedure implemented in SerialEM<sup>3</sup>. Recorded image frames were subjected to whole image beam-induced motion correction using MOTIONCORR<sup>4</sup>. We used e2boxer in EMAN2<sup>5</sup> for particle picking and RELION<sup>5,6</sup> for 2D classification.

Importantly, 2D classification and averaging did not produce meaningful results because the particles showed high conformational variability. This made it impossible to solve the structure entirely by cryo-EM.



## Supplementary note 5: Random RNA control

RANDOM is a sequence formed by randomly scrambling HOTAIR sequence to yield a sequence with the same length and base composition. RANDOM was synthesized using the same IVT systems used for HOTAIR, and scanned in the AFM using the same protocols and settings. RANDOM formed no distinct shapes, and in about half of the cases did not even fold into a shape.

>RANDOM

```
UAAUACGACUCACUAUAGGUGUUUJGCACUACCGUCAGGUACGUUAGUAUGCGUUCUCCUCCAGAGGU
AUGUGGCUGCGUGGUCAAAAGUGCGGCAUUCGUUUUGCUCCUCGUGUUUACUCUCACAAACUUGACCUG
GAGAUCAAAGAGAUUCUUGUGAACUGGACAACGCAUCAACGCAACGGAUCUACGUUACAGCGUGCA
UAGUGAAAACGAAGUUGCUGACGACGAAAGCGACAUUGGGAUCUGUCUGUUGUCAUUCGCGAAAAACAUC
CGUUCACGAGGCGGACACUGAUUGACACGGUUUUGUAGAAGGUUAGGGGAAUAGGUUAAAUUGAGUGGCU
UAAAAAUGUUUAUUCUGGGAUUAAAGUGUAGUAAACUGUAAUUAACGGAGACGGUUUUAAGACAGGAGUU
CGCAAAAUCAAGCGGGGUCAUUACAACAGUUUUCUGAUGGUUUAGGCGUACA AUGUCCUGAAGAAUUAU
UUAGAAAAAAGCACCCUCGUCGCCUAGAAUACCUACCGCGGUCGACCAUACCUUCGAUUUUCGCGCC
CACUCUCCCAUAGUCGGCAGAGGUGGUUGUGUUGCGAUAGCCCAGUAUGAUUUUAAGGCGUUACGCU
GAUGAAUUAUUCUACAGAAUUGCCAUAAGGCGUUGAACGCUACACGGACGAUACGAAUUUAUGUAUAGAGCG
GGUCAUCGAAAGGUUAUACUCUUGUAGUUAACAUGUAGCCCGGCCUUAUAGUACAGCAGUGCCUUGAAU
GACAUUCUCAUUAUAAAUUUCUCUACAGCCAAACGACCAAGUGCAUUUCCACGGAGCGGAUGGAGAU
UCAUUCACUCGGCAGCUCUGUAAUAGGGACUAAAAGAGUGAUGAUAAUCAUGAGUGCCGUGUUUAUGAUGG
UGUCGGAACAAAGCGGUUCUACGGUCAGUCGUUUCCUUCUCGAGUUCGUCAGUUAAGCGUGACACUC
CCAGUGUACCGCAAACCGUGAUGGCUGUGCUUGGAGUCAUUCGCAUGUAGGAUGGUCUCCAGACACCGG
GGCACCAGUUUUCACGCCUAAAGCAUAAACGACGAGCAGUCAUGAAAGUCUUAAGAACUGGACGUGCCGUU
UCUCUGCGAAUAAUACCUCAAGCUGUACCGUUAUUGCGCUGCUUAGAUGCAGUGCUCUCUUAUCACAUU
UGUUUCGACGACUGCCGCCUUCGCUUUCCUUAAGACACUUAACAAUAAGCGCUUUUUGUAGGCAGAGGC
ACCCCUAAUAGUGGCUGCGCCAAAUAUCUUCGGAUCCCCUUGUCCAUAUAAUUGAUUGAAUUCUJUC
AUUUAAAGACCCUAAUUAUGACAUCAUUAUGAUUAAAUGCCACUCCAAAUAUCGCCUAGAAAUGUUUAA
GUUCGCUCCACUAAAGUUGUUUAAAACGACUACUAAAUCCGCGUGAUAGGGGAUUUCAUUAUUAAUCUUU
UAUCGUAAGGAACAGCCGAUCUUAUUGGAUGGCCGCAGGUGGUUAUGGAAGCUUAAGCGCGGGUGAGAGG
GUAUUUAGGCGUGUUCACCUACACUACGCUAACGGGCGAUUCUAUAAGAUUGCACAUJGCGUCUACUUAU
AAGAUGUCUACACGGCAUGCGCAACUUGUGAAGUGUCUACUUAUCCUUAACGCAUAUCUCGCACAGUAAC
UCCCCAAUUAUGUGAGCAUCUGAUGUUGCCCGGGCCGAGUUAGUCUUGUGCUCACGGAACUUAUUGUAUGA
GUAGUGAUUUGAAAGAGUUGUCAGUUAGCUCGUUCAGGUAAUAGUCCUCACACUACGUCAAAAUAAGAG
AACGGUCGUAACAUUAUCCGUGAUUUUCUACUACUUAUCAGUACUCACGACUCGAUUCUGCCGCAGCCAC
GUAUCGCCAGAAAGCCAGUCAGCAUUAAGGAGUGCUCUGAGCAGGACAACUCGCAUAGUGAGAGUUACAU
GUUCGUJGGGUCUUCGACACGAACCUAGUUGGCCUACAUCUACCUAGAGGUCUGUGCCCCGGUGAUG
AGAAGUAUGCAUUUCGUUCUUGCAGCUUGUCAGUACUUUCAGAAUCAUGGCCUGCAUGGUAGAAUGACGC
UUAUAAUGGACUUCGACAUGGCAUAACCCCCGUUUCUACUUAAGAGGAGAAAAGU
```

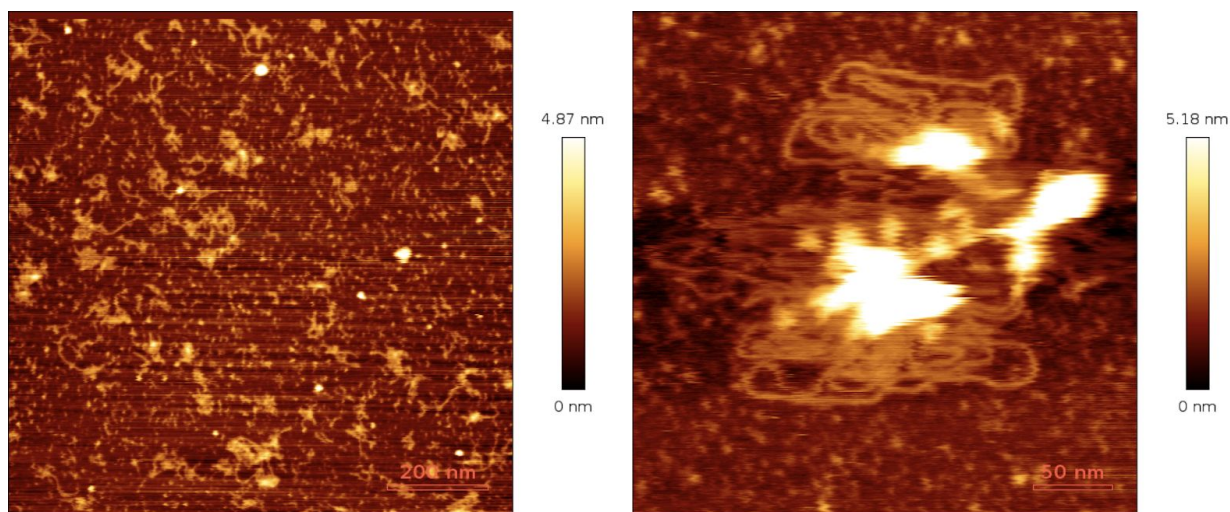

**Figure S4.** RANDOM RNA AFM scans.

**Supplementary note 6: AFM of HOTAIR modules**

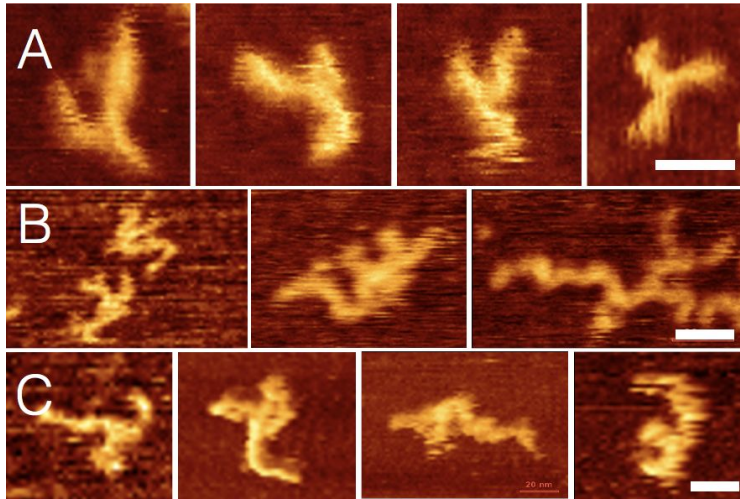

**Figure S5.** AFM scanning of the proposed functional modules of HOTAIR: 300 nt (A), 1200 nt (B), 658 nt (C) (bars = 15 nm).

## Supplementary note 7: DNA synthesis

p-HBD was purchased from DNA2.0. Plasmids was fully sequenced to ensure accuracy. PCR primers for the amplification of DNA templates for IVT were synthesized by Integrated DNA Technologies. HBD1 was the most enriched sequence in a ChIRP<sup>7</sup> study, where HOTAIR was precipitated. HBD4 was not precipitated with HOTAIR.

>HBD1\_chromosome13:56624796-56625228

```
TGTAGACTGAAAGAAAAGAGATTAATAAAGATACTCCATGTAAATGGAAACCATAAATCACCAAGAGTA
GCCACATGTCTACCAGATAAAACATATTTGACTCAAAAAACATAACAGAGACAAAGAAGTTTATTATATA
ATGATAAAGAAATCACTTTAGCAAGAGGACATAATAATTCTAAGCACACATGCAAGCAACTAGAGCAC
TTGGATATATAAGGCAAATATTATTAGATCTAATGGGAGAGAAAACCCAATACAAAAATTTTGGGGAC
TTTGACACACCCTTCTCAGCATTATAAAGTTCATCTAGAAAGATAATTAACAGAGCAATTTTGGCTTTAA
ACTACACTTTGGAACAAATAGAATAACAGATATTTAAAGAACATTTTATCCAAAACTACAGAATACAC
AGAATACACATTC
```

>HBD4\_chromosome13:57000000-57000432

```
TTGCAAGTTCAATGTTAGATATTTGAAATGTTCTGATCTTTTTAAACAATTTGAATAGAAAGCAGACAAT
GTAGGTTAAAATTTTAATATAAATTGAAGGATCTAATGTAAGAAATTAATAACTTTAAGCACCTAACTC
CTCCATGCCTGATATATAGAAGATGATAATTAATGTTTGCTAAATGAATGCATTGACAACACAGTTTCT
CTTTTATTCTAAAGCATTCTTTTGGATAAGTACTACTACCATCAGAGCTCAGGTCATAAAATTACATC
CAGGAAGAAATTCTCAGAATGTTAACTTGTGAGAATACTGTATACTGCTGTCAAAGTTGATTCTCAG
GAAAATGCTGTGCCATTCTTCTTTAACATCATGTTTCTTATGGCATATTACACCCAGAACTAGGCAGTC
ATATCAAATTAGA
```

HBD1 and HBD4 were amplified using the following primers:

>HBD1\_Fwd

```
TGTAGACTGAAAGAAAAGAGATTAATAA
```

>HBD1\_Rev

```
GAATGTGTATTCTGTGTATTCTGTAG
```

>HBD4\_Fwd

```
TTGCAAGTTCAATGTTAGATATTTGAAA
```

>HBD4\_Rev

```
TCTAATTTGATATGACTGCCTAGTTC
```

HBD1 and HBD4 were generated by PCR with high-fidelity DNA polymerase HyFy High Fidelity mix (HyLabs) according to manufacturer's instructions. All products were confirmed by agarose gel electrophoresis. PCR products were then purified using Qiagen PCR purification kit.

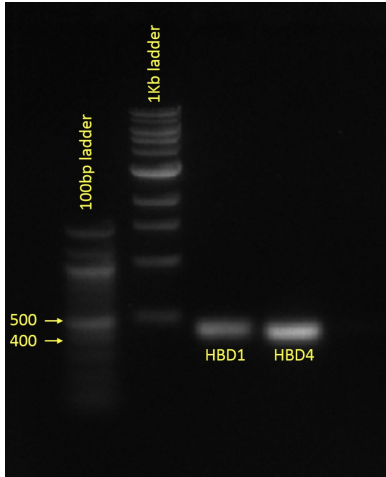

**Figure S6.** Gel image showing products

## Supplementary note 8: Molecular measurements and modeling

In order to measure observed HOTAIR molecules, AFM images were first scaled to have similar resolution of 1px/nm, and then processed to improve clarity and traced using splines to build a tree structure that follows the observed geometry. Processing included conversion to grayscale, histogram auto-leveling and strong contrast filter, performed in ADOBE Photoshop. Tracing was done in SOLIDWORKS using a sketch with the true resolution image in the background. Spline length was later measured with the Measurement tool.

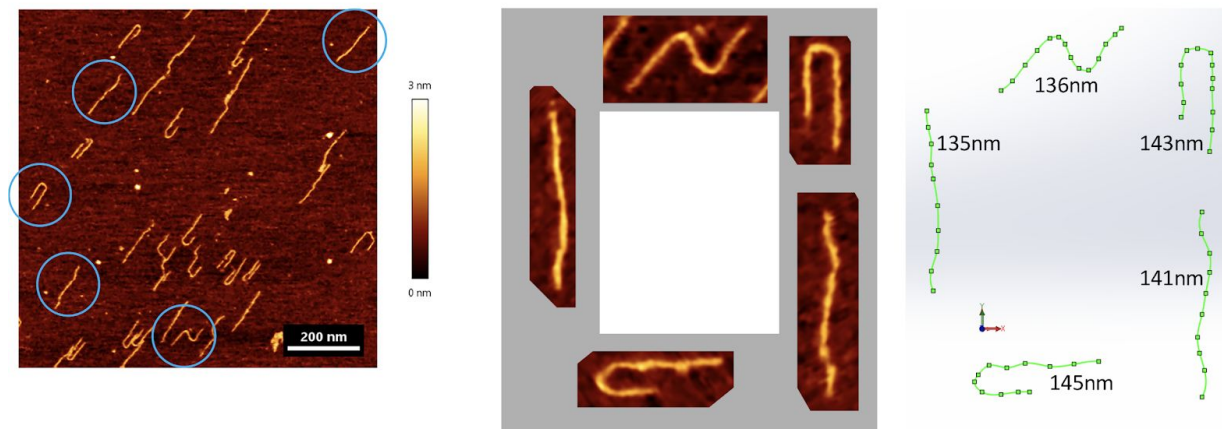

**Figure S7.** Measurements of size reference DNA (HBD1). On the left an imaged field of HBD1 dsDNA fragments. Right, selected objects and their measured traces.

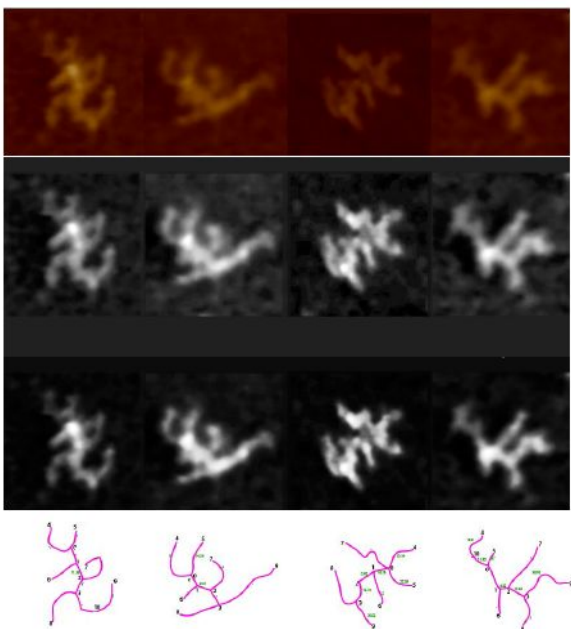

**Figure S8.** Image processing for dimension measurements of 4 selected HOTAIR molecules. Entire images were converted to grayscale and each specimen was autolevelled locally (row 2).

Next strong contrast curves were added to entire images (row 3). Row 4 shows the specimen traces for size measurements.

### **Visual structural model of HOTAIR**

The aim was to create a three-dimensional computer generated model of the HOTAIR structure, proportional to scale and representative of the observed structure. The model was created and rendered using Autodesk Maya 2016 and mental ray renderer.

An A-DNA molecule (PDB ID: 1TTD) was downloaded and imported into Autodesk Maya through the molecular maya Protein Data Bank (PDB) import kit. Chain B of the dodecamer duplex was selected and scaled to 2.3 scale units (SU) wide and 2.86 SU long, and edited to smoothly connect to another subunit (each scale unit in maya was considered to be 1nm). This subunit was duplicated 140 times to generate a single strand DNA (404.4 SU long). The ssDNA was rigged using a lattice and joints. To create the dsDNA mesh according to the observed structure, a path was drawn, which can be adjusted in the three directions of space using control points, and assigned as as the IK spline handle of the mesh. Finally the structure was rendered in high quality using the mental ray renderer.

## Supplementary note 9: Triplexator

Triplexator is a prediction algorithm that detects potential nucleic acid triple helices in genomic and transcriptomic data<sup>8</sup>. With the kind assistance of Dr. Buske we ran HBD1 and HOTAIR sequences in Triplexator to highlight potential triple helical structures, in an attempt to define the mechanism of observed physical interaction between these two molecules. One assumption that was made in this analysis is that the interaction is between genomic DNA in its dsDNA state, and HOTAIR through an ssRNA segment (i.e. most likely a loop).

Below is the output. The algorithm produced three scenarios, each beginning with a line describing the parameters on the list appearing at the beginning. At the end is the log file output including all the parameters used.

```
# Sequence-ID
TFO start
TFO endDuplex-ID
TTS start
TTS endScore
Error-rate
Errors
Motif
Strand
Orientation
Guanine-rate

seq2  538  548  seq1  287  297  9  0.1  d1  R  -  A  0.6
5'- CACCCTTCTC -3'
TTS: 3'- GtGGGAAGAG -5'
      |*|||||||
TFO: 5'- GAGGGAAGAG -3'

seq2  1252 1262  seq1  8  18  9  0.1  t2  M  +  P  0.3
TFO: 5'- GTGTGTTTTG -3'
      ||*|||||||
TTS: 5'- GAAAGAAAAG -3'
      3'- CTTTCTTTTC -5'

seq2  1253 1266  seq1  8  21  12  0.077  t1  M  +  A  0.31
TFO: 3'- GGTGTTTTGTGT -5'
      |*|||||||
TTS: 5'- GAAAGAAAAGAGA -3'
      3'- CTTTCTTTCTCT -5'
```

```
*****
*** Triplexator - Finding nucleic acid triple helices ***
*** (c) Copyright 2011 by Fabian Buske ***
*** Comments, Bugs, Feedback: f.buske@uq.edu.au ***
*****
*** Version 1.3.2 (30/03/2012) SeqAn Revision: 1225
*** COMMAND:
>triplexator -ss RNA.fasta -ds DNA.fasta -po -l 10 -g 30 -of 1 -e 10 -o hali.tpx
*****
*** INPUT:
- single-stranded file supplied : Yes
```



```

- duplex file supplied : Yes
-> search putative triplexes (matching triplex-forming oligonucleotides and target sites)
*****
*** Output Options:
- output directory : ./
- output file : hali.tpx
- output format : 1 = extended Triplex (+Alignment)
- merge features : Yes
- report duplicate locations : No
- error reference : 0 = Watson strand (TTS)
*****
*** Main Options:
- maximum error-rate : 10%
- maximum total error : 3
- minimum guanine content with respect to the target : 30%
- maximum guanine content with respect to the target : 100%
- minimum length : 10 nucleotides
- maximum length : 30 nucleotides
- maximum number of tolerated consecutive pyrimidine interruptions in a target: 1
- include GT-motif : Yes
- include GA-motif : Yes
- include TC-motif : Yes
- minimum guanine-percentage in anti-parallel mixed motif TFOs : 0%
- maximum guanine-percentage in parallel mixed motif TFOs : 100%
- number of consecutive matches required in a feature : 1
- longest match only : yes
- detect duplicates : 0 = off
- same sequence duplicates : on
*****
*** Filtration Options :
- filter repeats : Yes
- minimum repeat length : 10
- maximum repeat period : 4
- duplicate cutoff : -1
- filtering : none - brute force
*****
*** Runtime mode:
- OpenMP support : Yes
- runtime mode : 0 = serial
*****
*** Log messages:
[02/10/16 21:32:49] * Started checking duplex file
[02/10/16 21:32:49] * Finished checking duplex file
[02/10/16 21:32:49] * Started reading single-stranded file:RNA.fasta
[02/10/16 21:32:49] * Finished reading single-stranded file (1 sequences read)
[02/10/16 21:32:49] * Started detecting triplex-forming oligonucleotides in single-stranded
sequences
[02/10/16 21:32:49] * Finished detecting TFOs within 0.014 seconds (46 TFOs detected)
[02/10/16 21:32:49] * Started searching for triplexes
[02/10/16 21:32:49] * Processing DNA.fasta
[02/10/16 21:32:49] * Finished processing DNA.fasta
[02/10/16 21:32:49] * Finished searching for triplexes within 0.00775 seconds (summed over
all cpus)
[02/10/16 21:32:49] * Exit without errors
[02/10/16 21:32:49] * Finished program within 0.0456 seconds

```

## Supplementary note 10: RNA joint analysis

DNA origami rectangles were designed using caDNAno v2.0 (<http://cadnano.org/>), using M13mp18 (p7249) bacteriophage genome (Tilbit Nanosystems) as scaffold strand. The rectangle is identical to the basic origami object described by Rothemund <sup>9</sup>, with additional side-facing handles used as RNA joint connectors. DNA staple strands were from Integrated DNA Technologies (IDT).

The caDNAno file can be downloaded from the following link:

<https://drive.google.com/open?id=0B-CNvwEZiM3rcWpnUDNnVFViRnM>

DNA staple strands were reconstituted at 100  $\mu$ M with DNase/RNase free DDW. For folding reactions of DNA origami shapes, scaffold and staple strands were mixed at a 1:10 molar ratio in 1X TAE (40 mM Tris-acetate, 1 mM EDTA, pH 8.3) or folding buffer (5 mM Tris, 1 mM EDTA, 5 mM sodium chloride at pH 8), either supplemented with 10 mM magnesium chloride. Folding was performed in a thermal cycler (BioRad C1000 Touch Thermal Cycler) by a thermal annealing ramp as follows: 3 min at 90 °C, followed by stepwise cooling to 4 °C at -0.1 °C steps for a span of 12 hours. Folded objects were purified by 3X sequential centrifugal gel filtration using Amicon Ultra-0.5 mL 100K centrifugal filters (Millipore). DNA concentration was measured by spectrophotometer (Thermo Sci. NanoDrop 2000c). Objects were then electrophoresed on 1% agarose gels (ice cold 0.5X TBE, 10 mM magnesium chloride) stained with ethidium bromide.

Folded squares were incubated with x24molar ratio of RNA overnight in 1xTAE, 12.5 mM MgCl<sub>2</sub> at 37°C.

>RNAjoint\_Sense

CCGACCCGAGGCGUGUUUAGCAAUUUACACCUCUGUUGGCAUUAUUCAGCGC

>RNAjoint\_Antisense+loadingseq

GCGCUGAUUAAUGCCAACAGUACUACCCCCCUAAACACGCCUCGGGUCGGGAACUGGAGUAGCACAA

MFE structure at 37.0 C

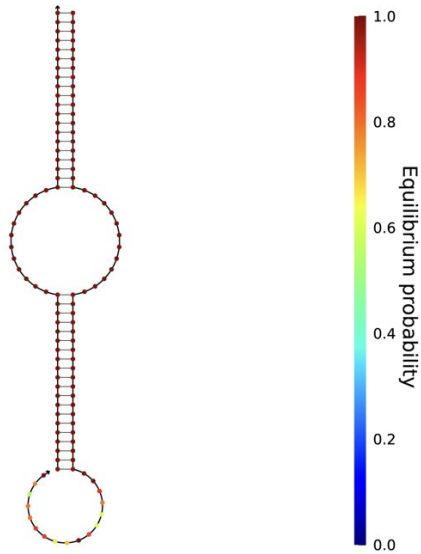

Free energy of secondary structure: -72.18 kcal/mol

**Figure S9.** NUPACK prediction showing RNA joint structure. Small loop is in fact not a loop but a tail used for docking onto the origami rectangle.

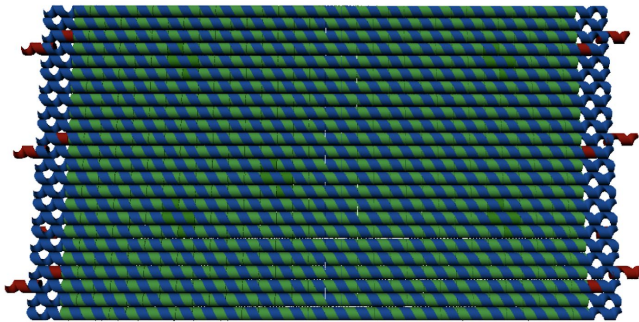

**Figure S10.** DNA origami rectangle with side-facing loading sites for RNA joints, used as AFM imaging guides.

Scanned images were analyzed using the angle tool in FIJI. Only joints that could be reliably assigned were used in the analysis.

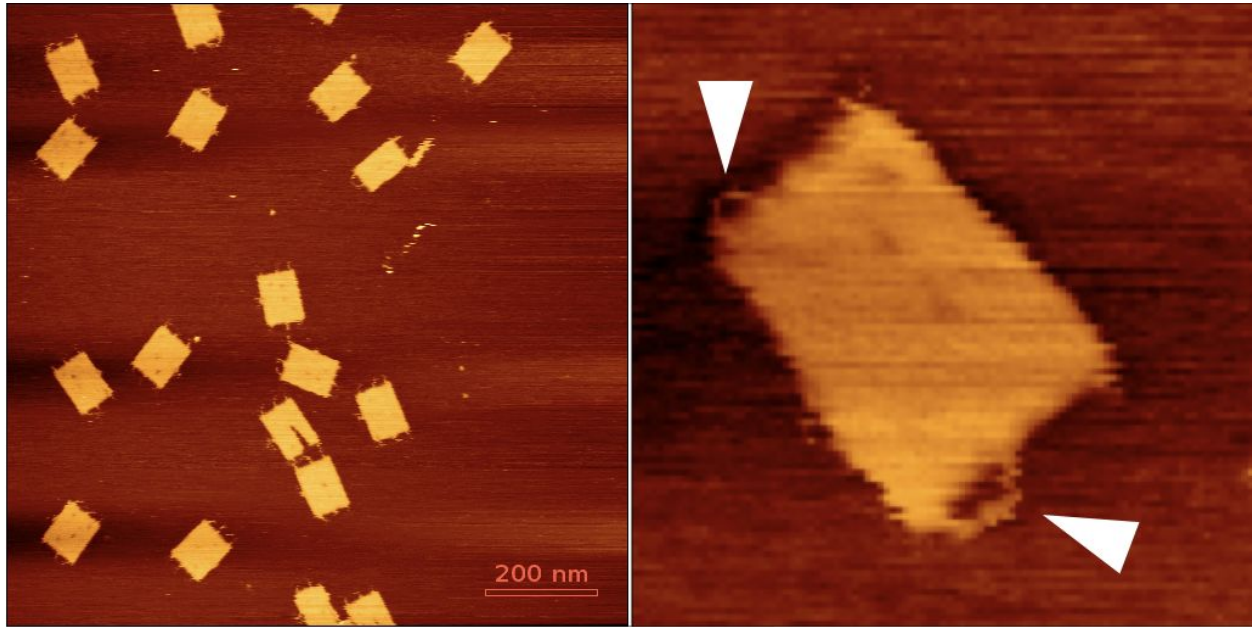

**Figure S11.** Joint

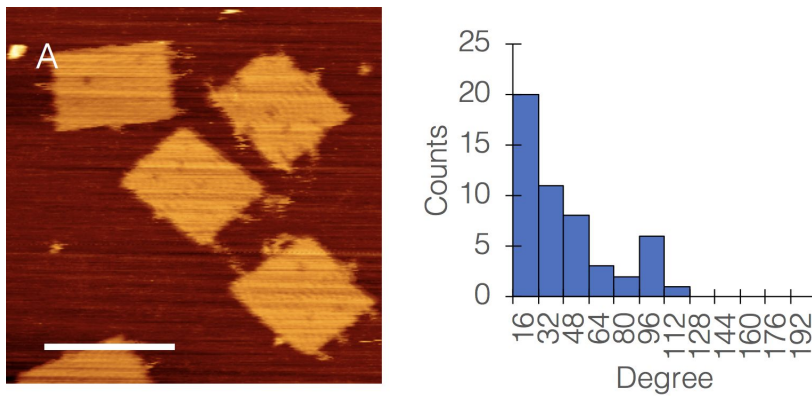

**Figure S12.** Joint analysis. Note the peak at  $\sim 90$  degrees, which derives from the interaction between two adjacent joints. This phenomenon results from the joint ending in a blunt end which is hydrophobic, driving adjacent joints to interact in order to minimize contact with the aqueous buffer.

DNA origami scaffold and staple sequences are as follows:

>M13mp18\_p7249

```
AATGCTACTACTATTAGTAGAATTGATGCCACCTTTTCAGCTCGCGCCCAAATGAAAATATAGCTAAACAGGTTATTGACCATTTGCGAAATG
TATCTAATGGTCAAACATAAATCTACTCGTTTCGAGAATTGGGAATCAACTGTTATATGGAATGAACTTCCAGACACCGTACTTTAGTTGCATA
TTTAAAACATGTTGAGCTACAGCATTATATTCAGCAATTAAGCTCTAAGCCATCCGCAAAAATGACCTCTTATCAAAAAGGAGCAATTAAGGTA
CTCTCTAATCCTGACCTGTTGGAGTTTGCTTCCGGTCTGTTTCGCTTTGAAGCTCGAATTAACGCGATATTTGAAGTCTTTTCGGGCTTCTC
TTAATCTTTTTGATGCAATCCGCTTTGCTTCTGACTATAATAGTCAGGGTAAAGACCTGATTTTTGATTTATGGTCATTCTCGTTTTCTGAACT
GTTTAAAGCATTGAGGGGATTCAATGAATATTTATGACGATTCGCGAGTATTGGACGCTATCCAGTCTAAACATTTTACTATTACCCCTCT
GGCAAAACTCTTTTGCAAAAGCCTCTCGCTATTTTGTTTTTATCGTCGTCCTGGTAAACGAGGGTTATGATAGTGTGCTCTTACTATGCCTC
GTAATTCCTTTGGCGTTATGTATCTGCATTAGTTGAATGTGGTATTCTAAATCTCAACTGATGAATCTTTCTACCTGTAATAATGTTGTTCC
GTTAGTTCGTTTTATTAACGTAGATTTTTCTCCCAACGTCCTGACTGGTATAATGAGCCAGTTCTTAAAATCGCATAAGGTAATTCACAATGA
```

TTAAAGTTGAAATTAACCATCTCAAGCCCAATTTACTACTCGTTCTGGTGTTCCTCGTCAGGGCAAGCCTTATTCCTGAATGAGCAGCTTTG  
TTACGTTGATTTGGGTAATGAATATCCGGTCTTGTCTTTCAAAGTTGGTCAGTTCGGTCCCTTATGATTGACCGTCTGCGCCTCGTTCCGGC  
TAAGTAACATGGAGCAGGTGCGGGATTTTCGACACAATTTATCAGGCGATGATACAAATCCTCGTGTACTTTGTTTCGCGCTTGGTATAATCGC  
TGGGGGTCAAAGATGAGTGTTTAGTGTATTTCTTTGCTCTTTCTGTTTGGTTCCTCGTAGTGGCATTACGTATTTTACCCTTTAA  
TGGAACTTCTCATGAAAAAGTCTTAGTCTCAAGCCTCTGTAGCCGTGTACCTCGTCCGATGCTGTCTTTGCTGCTGAGGGTGC  
GATCCCGCAAAGCGCCTTAACTCCCTGCAAGCCTCAGCGACCGAATATATCGTGTATGCGTGGGCGATGGTGTGTGCTATGTCGGCGCAA  
CTATCGGTATCAAGCTGTTAAGAAATTCACCTCGAAAGCAAGCTGATAAACCGATACAATTAAGGCTCCTTTTGGAGCCTTTTTTTGGAGA  
TTTTCAACGTGAAAAAATTTATTTGCAATTCCTTAGTGTCTTTCTATTCTCACCTCGCTGAAACTGTTGAAAGTTGTTTAGCAAATC  
CCATACAGAAAATTCATTTACTAACGTCTGGAAAGACGACAAAATTTAGATCGTTACGCTAATGAGGGCTGTCTGTGGAATGCTACAGGC  
GTTGTAGTTGTACTGGTGACGAAACTCAGTGTACGGTACATGGGTTCTATTGGGCTTGCTATCCCTGAAAATGAGGGTGGTGGCTGAGG  
GTGGCGTCTGAGGGTGGCGGTTCTGAGGGTGGCGGTACTAAACCTCTGAGTACGGTATACACCTATTTCCGGGTATACTTATATCAACCC  
TCTCGACGGCACTTATCCGCTGGTACTGAGCAAACCCCGTAATCCTAATCCTTCTTTGAGGAGTCTCAGCCTTAATACTTTTCATGTT  
CAGAATAATAGGTTCCGAAATAGGCAGGGGCGATTAAGTGTATACGGGCACTGTTACTCAAGGCACTGACCCGTTAAAATTTATACCAGT  
ACACTCTGTATCATCAAAGCCATGTATGACGCTTACTGGAACGTTAAATCAGAGACTGCGCTTTCCATTCTGGCTTTAATGAGGATTTAT  
TGTGTGTAATCAAGGCCAATCGTCTGACCTGCCTCAACCTCTGTAATGCTGGCGCGGCTCTGGTGGTGGTCTGGTGGCGGCTCTGAG  
GGTGGTGGCTCTGAGGGTGGCGGTTCTGAGGGTGGCGGCTCTGAGGGAGGCGGTTCCGGTGGTGGCTCTGGTCCGGTGATTTGATTATGAAA  
AGATGGCAAACGCTAATAAGGGGGCTATGACGAAAATGCCGATGAAAACGCGCTACAGTCTGACGCTAAAGGCAAACCTGATTCTGTGCTAC  
TGATTACGGTGTCTATCGATGGTTCATTGGTGAGTTCCTGGCCTTGCTAATGGTAATGGTGTACTGGTGTATTTGCTGGCTCAATTCC  
CAAATGGCTCAAGTCCGGTGACGGTGATAATTCACCTTAATGAATAATTTCCGTCAATATTTACCTTCCCTCCCTCAATCGGTTGAATGTCGCC  
CTTTTGTCTTTGGCGCTGGTAAACCATATGAATTTTCTATTGATTGTGACAAAATAAATTTATCCGTGGTGTCTTTGCGTTCCTTTTATATGT  
TGCCACCTTATGATGATATTTCTACGTTTGCTAACATATGCGTAATAAGGAGTCTTAATCATGCCAGTTCCTTTGGGATTTCCGTTATTTAT  
TGCGTTTCTCGTTCCTTCTGTTAACTTTGTTGCGCTATCTGCTACTTTTCTAAAAGGGCTTCGGTAAGATAGCTATGCTATTTTCTATT  
GTTTCTGCTCTTATTATTGGGCTTAACTCAATCTTGTGGTTATCTCTGATATTAGCGCTCAATTACCTCTGACTTTGTTTACGGGTGTT  
CAGTTAATCTCCCGTCTAATGCGCTCCCTGTTTTATGTTATTCTCTCTGTAAGGCTGCTATTTTCTTTTACGTTAAACAAAAAATCG  
TTTCTATTTGGATTGGGATAAATAATATGGCTGTTATTTGTAAGTGGCAAATTAGGCTCTGGAAAGACGCTGTTAGCGTTGGTAAGATTC  
AGGATAAAATGTAGCTGGGTGCAAAATAGCAACTAATCTTGATTTAAGGCTTCAAACCTCCCGCAAGTGGGAGGTTTCGTAACGCTTCG  
CGTCTTAGAATACCGGATAAGCCTTCTATATCTGATTTGCTTGTATTGGGCGCGGTAATGATTCCTACGATGAAAATAAAACGGCTTGTCT  
GTTCTCGATGAGTGGGACTTGGTAAATACCCGTTCTTGGAAATGATAAGGAAAGACAGCCGATTATTGATTGGTTCATACGCTCGTAAAT  
TAGGATGGGATATTTTCTTGTTCAGGACTTATCTATTGTTGATAAACAGGCGCGTCTGCAATTAGCTGAACATGTTGTTATTTGCTGCTG  
TCTGGACAGAATTTACTTTTCTGCGTACTTTTATTTACTGGCTCGAAAATGCCTTAAATACATGTTGGCGTTGTT  
AAATATGGCGATTCTCAATTAAGCCCTACTGTTGAGCGTTGGCTTTATCTGTTAAGAATTTGATAACGCATATGATACTAAACAGGCTTTTT  
CTAGTAATATGATTCCGGTGTATTCTTATTTAACGCTTATTTATCACACGGTCCGGTATTTCAAACCATTAATTTAGGTGAGAAGATGAA  
ATTAATAAAATATATTTGAAAAAGTTTTCTCGCTTCTTTGCTTGGCATTGGATTGTCATCAGCATTACATATAGTTATATAACCAACCT  
AAGCCGGAGGTTAAAAGGTAGTCTCTCAGACCTATGATTTTGATAAATCACTATTGACTCTTCTCAGCGTCTTAATCTAAGCTATCGCTATG  
TTTTCAAGGATTCTAAGGAAAAATTAATAATAGCGACGATTACAGAAGCAAGGTTATCACTCACATATATTGATTTATGTAAGTGTTCAT  
TAAAAAGGTAATCAAATGAAATTTGTAATGTAATTAATTTGTTTTCTTGATGTTGTTTCATCATCTTCTTTGCTCAGGTAATGAAAT  
GAATAATTCGCTTGCAGGATTTGTAACCTGGTATTCAAAGCAATCAGGCGAATCCGTTATTGTTTCTCCGATGTAAGGACTGTTACT  
GATATTTACTGACGTTAAACCTGAAAATCTACGCAATTTCTTATTTACTGGTTCGAAAATAATTTGATGATGGTGGTACTTAAACCTT  
CCATTTACTCAGAAGTATAATCCAAACAATCAGGATTAATTGATGAAATGCCATCATGATAATCAGGAATATGATGATAATTCGCTCCTTC  
TGGTGGTTCCTTTGTTCCGCAAAATGATAATGTTACTCAAACCTTAAAATTAATAACGTTCCGGCAAAGGATTTAATACGAGTTGTGCAATTG  
TTGTAAAGTCTAATACTTCTAAATCTCAAATGATTTATCTATTGACGGCTAATCTATTAGTGTGTAGTGTCTCTAAAGATATTTAGATA  
ACCTTCTCAATTCCTTTCAACTGTTGATTTGCCAAGTACGACGATTTGATTGAGGGTTGATATTTGAGGTTGAGCAAGGTGATGCTTTAGA  
TTTTTCTTTGCTGCTGGCTCTCAGCGTGGCACTGTTGCAAGGCGGTTAATACTGACCGCTCACCTCTGTTTTATCTTCTGCTGGTGGTTCG  
TTCGGTATTTTAAATGGCGATGTTTAGGGCTATCAGTTCGCGCATTAAGACTAATAGCCATTAAAAATATTGCTGTGCCACGATTTCTTA  
CGCTTTCAAGTCAAGGGTCTATCTCTGTTGGCCAGAATGTCCTTTTATTACTGGTGTGACTGGTGAATCTGCCAATGTAATAATCC  
ATTTGAGCAGATTGAGCTCAAATGATGTTTCCATGAGCGTTTTTCTGTTGCAATGGCTGGCGGTAATATTGTTCTGGATTTACAGC  
AAGGCCGATAGTTTGGTCTTCTACTCAGGCAAGTATGTTATTACTAATCAAAGAAGTATTGCTACAACGGTTAATTTGCGTATGACAGAGA  
CTCTTTTACTCGGTGGCCTCACTGATTATAAAAAACACTTCTCAGGATTTGCGGTACCCTTCTGTCTAAAATCCCTTTAATCGGCCTCTGTT  
TAGCTCCCGCTCTGATTCTAACGAGGAAAGCAGGTTATACGTCTCGTCAAAGCAACCATAGTACGCGCCTGTAGCGGCGCATTAGCGCGGC  
GGGTGTGGTGGTTACGCGCAGCGTACCGCTACACTTGCAGCGCCCTAGCGCCGCTCCTTTGCTTTCTCCCTTCTTCTCGCCACGTTT  
GCCGGCTTTCCCGTCAAGCTCTAAATCGGGGGCTCCCTTTAGGGTCCGATTTAGTGTCTTACGGCACCTCGACCCAAAAAATGATTGG  
GTGATGGTTCACGTAGTGGGCCATCGCCCTGATAGACGGTTTTTGCCTTTGACGTTGGAGTCCACGTTCTTTAATAGTGGACTCTTGTCCA  
AACTGGAACAACACTCAACCTATCTCGGGCTATTTCTTTGTTTATAAGGGATTTTGGCGATTTCCGAAACCACTCAAACAGGATTTTCCG  
TGCTGGGCAAACACAGCTGACCGCTTGTGCAACTCTCTCAGGGCCAGCGGTGAAGGGCAATCAGTGTGCGGCTCTACTGGTAAAAAG  
AAAAACCACTTGGCGCCAAATACGCAAAACCGCTTCCCGCGCGTTGGCCGATTCATTAATGCAAGTGGCACGACAGGTTTCCCGACTGGAA  
AGCGGGCAGTGAGCGCAACGCAATTAATGTGAGTTAGCTCACTCATTAGGCACCCAGGCTTTACTTTTATGCTTCCGGCTCGATGTTGTGT  
GGAATTTGAGCGGATAACAATTTACACAGGAAACAGCTATGACCATGATTACGAATTCGAGCTCGGTACCGGGGATCCTCTAGAGTCGACC  
TGCAGGATGCAAGCTTGGCACTGGCCGTCGTTTTACAACGTCTGACTGGGAAAACCTGGCGTTACCCAATTAATCGCTTGCAGCACATC  
CCCTTTTCCGACGCTGGCGTAATAGCGAAGAGGCCCGACCGATCGCCCTTCCCAACAGTTGCGCAGCCTGAATGGCGAATGGCGCTTTGCGCTG  
GTTTCCGGCACCAAGCGGTGCGGAAAGCTGGCTGGAGTGCATCTTCTGAGGCGGATGCTGCTGCTCCCTCAAACCTGGCAGATGCAC  
GGTTACGATGCGCCATCTACACCAACGTGACCTATCCATTACGGTCAATCCGCGTGTGTTCCACGGAGAATCCGACGGGTGTTACTCGC

TCACATTTAATGTTGATGAAAGCTGGCTACAGGAAGGCCAGACGCGAATTTATTTTTGATGGCGTTCTATTGGTTAAAAAATGAGCTGATTTAA  
 CAAAAATTTAATGCGAATTTTAAACAAAATATTAACGTTTACAATTTAAATATTTGCTTATAACAATCTTCCGTGTTTTGGGGCTTTTCTGATTAT  
 CAACCGGGGTACATATGATTGACATGCTAGTTTTACGATTACGTTTCATCGATTCTCTGTTTGCCTCAGACTCTCAGGCAATGACCTGATAGC  
 CTTTGTAGATCTCTCAAAAATAGCTACCCTCTCCGGCATTAAATTTATCAGCTAGAACGGTTGAATATCATATTGATGGTGATTGACTGTCTCC  
 GGCCTTTCTACCCTTTTGAATCTTTACCTACACATTACTCAGGCATTGCATTTAAAATATATGAGGGTTCTAAAAATTTTTATCCTTGCCTTGC  
 AAATAAAGGCTTCTCCCGCAAAGTATTACAGGGTCATAATGTTTTTGGTACAACCGATTAGCTTTATGCTCTGAGGCTTTATTGCTTAATTT  
 TGCTAATCTTTGCCCTTGCTGTATGATTTATTGGATGTT

| START   | END     | SEQUENCE                          |
|---------|---------|-----------------------------------|
| 20[207] | 18[208] | CCAGCAGCAGGAAGGTTATCTAAAGCGGAACA  |
| 16[79]  | 14[80]  | AAACAGGAATGCCGGAGAGGGTAGCAAGGATA  |
| 13[256] | 15[255] | GAATAAACATAGTGAATTTATCAAAATCGTCCG |
| 11[224] | 13[223] | CCTGTTTATTGAGAATCGCCATATTTTCAAAT  |
| 2[47]   | 0[48]   | AAAGGAGCACTACAACGCCTGTAGAGCCACCA  |
| 11[192] | 13[191] | ATAACAAGTAATTTAGGCAGAGGGTTAATTT   |
| 5[160]  | 6[144]  | GTGGCAACAACGTAGAAAATACATCAATCATA  |
| 2[79]   | 0[80]   | TCACGTTGCTCATAGTTAGCGTAAAGAACC    |
| 3[128]  | 5[127]  | GCGGGATCCGAGGGTAGCAACGGCATGTTACT  |
| 14[79]  | 12[80]  | AAAATTTTGCAATTAACATCCAATAATAACAGT |
| 22[271] | 20[272] | AATATCCAGCGCAACTGATAGCCCCACCAGC   |
| 14[111] | 12[112] | GCGGGAGACAAGAATTAGCAAAACTAAAGTA   |
| 8[175]  | 6[176]  | ATAACATAACTGAACACCCTGAACACGCAGTA  |
| 7[160]  | 8[144]  | GAGAATTA AAAACAGGGAAGCGCATTGGGAAG |
| 1[96]   | 3[95]   | AGTTTTGTAAGGAATTGCGAATAATTCGGTCCG |
| 14[207] | 12[208] | AGGTTGGGGACCTAAATTTAATGGTTAACAAC  |
| 8[143]  | 7[159]  | AAAAATCTTATACCAGTCAGGACGTTAGACGG  |
| 22[143] | 21[159] | TGCGTATTGCCAACGCGCGGGGAGACGACCAG  |
| 1[192]  | 3[191]  | TCTGAATTTGACAGGAGGTTGAGGTTAGCGTC  |
| 13[128] | 15[127] | TAAAGCCTACATTATGACCCTGTATCATTGCC  |
| 23[96]  | 22[112] | AGTCCACTATTAAGAACGTGGACTTTCTTTT   |
| 21[192] | 23[191] | GAACCCTTCTCAATCGTCTGAAATGTTTTTA   |
| 10[159] | 9[143]  | AGATATAGATTCAATGAATCCCCCGGAATCG   |
| 12[271] | 10[272] | TCTTACCAAATATCCCATCTAATCTGTCTTT   |
| 15[96]  | 17[95]  | GAGAGATCGGTTGATAATCAGAAAATCAACAT  |
| 20[47]  | 18[48]  | CTGTGTGACTGTTGGGAAGGGCGATCGCACTC  |
| 18[143] | 17[159] | GGGATAGGAACAAACGGCGGATTGCAATTCAT  |
| 22[207] | 20[208] | TTTTGACGCTGACCTGAAAGCGTAGCTGAGAG  |
| 0[143]  | 1[127]  | GTATAGCCCGGAATAGGTGTATCAAGTAAATG  |
| 13[224] | 15[223] | ACCGACCGGACTACCTTTTAAACCAATATATG  |
| 15[128] | 17[127] | TGAGAGTCCGTA AAACTAGCATGTTCCGATTC |
| 15[32]  | 17[31]  | ACCATCAAGTTAATATTTTGTAAATTTTTTAA  |
| 2[207]  | 0[208]  | GCCAGCATTACCGTTCAGTAAGCAGAGAAGG   |
| 6[175]  | 4[176]  | TGTTAGCAATATAAAAAGAAACGCAAACGTCAC |
| 20[271] | 18[272] | AGAAGATAAAATACATTTGAGGATTACTCGTAT |
| 16[175] | 14[176] | TGATGAAAAACAATTTCAATTTGAAAAATGCTG |
| 15[160] | 16[144] | TTACATTTCAAACATCAAGAAAACATCGATGA  |
| 15[192] | 17[191] | TTAATGGTTCAATTACCTGAGCATATACTTC   |
| 22[111] | 20[112] | CACCAGTGA AACCTGTCGTGCCAGATGCCTGC |
| 9[224]  | 11[223] | TAAATCACTCATCGAGAACAAGCAGAACGCG   |
| 10[47]  | 8[48]   | GGATTGCAGACGATAAAAACCAAAAATAATG   |
| 5[192]  | 7[191]  | ACGGAATAATTAAGACTCCTTATTAAGTCAG   |
| 4[143]  | 3[159]  | CATCGGAAGTCACCCTCAGCAGCGCGTAATCA  |
| 7[224]  | 9[223]  | CCCACAAGAAGAAACGATTTTTTGTGAAAGCC  |
| 20[79]  | 18[80]  | CTCGAATTCGCTATTACGCCAGCTAGGGGACG  |
| 11[32]  | 13[31]  | TTCAAAGCTTAGATACATTTTCGATTTGGGGC  |
| 21[256] | 23[255] | TCTTTAATGAACAATATTACC GCCAGCAATAC |
| 4[47]   | 2[48]   | CTACGAAGAGTTGCGCCGACAATGAGGCTCCA  |

|         |         |                                  |
|---------|---------|----------------------------------|
| 19[96]  | 21[95]  | GGGGATGTTCTAGAGGATCCCCGGCCGCTTTC |
| 6[271]  | 4[272]  | TAGCCGAAACATTCAACCGATTGACATTAAG  |
| 20[175] | 18[176] | TTGCTGAATCAGTTGGCAAATCAATTATCATC |
| 16[111] | 14[112] | TGTACCCTACAAAGGCTATCAGGATACTTTT  |
| 20[143] | 19[159] | AACGACGGGTTTTCCAGTCACGACTCAATCA  |
| 1[32]   | 3[31]   | CAGTACAACTTTAATTGTATCGGTACAGCTTG |
| 23[64]  | 22[80]  | TAGGGTTGAGTGTGTTCAGTTTATTGCCCT   |
| 9[128]  | 11[127] | CAATACTGTCAAATGCTTTAAACAGCGGATGG |
| 22[175] | 20[176] | TACATTGGGGGACATTCTGGCCAAGCATCACC |
| 1[256]  | 3[255]  | TAAGTTTTCCACCCTCAGAGCCACCCATCTTT |
| 14[47]  | 12[48]  | CAATGCCTAAAAGGTGGCATCAATAGATTTAG |
| 6[143]  | 5[159]  | AGGGAACCACGAGGGCGACGGTACATAAAG   |
| 8[79]   | 6[80]   | TTGAGATTAGATGGTTAATTTACGCATAGG   |
| 23[256] | 22[272] | TTCTTTGATTAGTAATAACATCACTTGCTGGT |
| 17[64]  | 19[63]  | CTGGCCTTATCGGCCTCAGGAAGATCGGTGCG |
| 2[239]  | 0[240]  | GAGCCGCCGATGATACAGGAGTGACATGAAA  |
| 5[32]   | 7[31]   | CCCAGCGAATATTCATTACCCAAAAGGCTTGC |
| 15[256] | 17[255] | CTATTAATTAACGGATTCGCCTGAAATAAAGA |
| 1[224]  | 3[223]  | TGGCTTTTACCAGAACCACCACATTTTCGG   |
| 6[47]   | 4[48]   | AGAACCGGTTATACCAAGCGCAATAATGCCA  |
| 1[128]  | 3[127]  | AATTTTCTTTCAGCGGAGTGAGAACCGCTTTT |
| 3[160]  | 4[144]  | GTAGCGACCCATCGATAGCAGCACAAAGACAG |
| 11[256] | 13[255] | AGAAAAATGTATAAAGCCAACGCTTTAAATAA |
| 12[175] | 10[176] | AGCCAGTAAGTAATTTGTCCAGAACCAGCGCC |
| 10[111] | 8[112]  | AACGAGAAAAAATGTTTAGACTGGCTAACGGA |
| 19[128] | 21[127] | ACGCCAGGCCAGTGCCAAGCTTGCCTGCATTA |
| 3[32]   | 5[31]   | ATACCGATGCACCAACCTAAAACGCTTTGACC |
| 12[79]  | 10[80]  | TGATTCGCGATTAGAGAGTACCTATCAGGTC  |
| 17[192] | 19[191] | TGAATAATACCAGAAGGAGCGGAACAGTTGAA |
| 20[111] | 18[112] | AGGTCGACGCTGCAAGGCGATTAAAGGCGCAT |
| 5[128]  | 7[127]  | TAGCCGAGAACTGACCAACTTTGTTAAGAAC  |
| 18[47]  | 16[48]  | CAGCCAGCAACGCCATCAAAAATATATTTAAA |
| 23[160] | 22[176] | ACGGTACGCCAGAATCCTGAGAAGGGATTATT |
| 10[79]  | 8[80]   | TTTACCCTGCAAAAAGAAGTTTGTCTCATCAG |
| 11[64]  | 13[63]  | ACAGGTCAAATTCGCGAACGAGTTCTACTAA  |
| 18[111] | 16[112] | CGTAACCGAGCGAGTAACAACCCGCAATCATA |
| 8[111]  | 6[112]  | ACAACATTATTACCTTATGCGATTAAAGAGGA |
| 18[79]  | 16[80]  | ACGACAGTCTGTAGCCAGCTTTCAGCCCAA   |
| 9[32]   | 11[31]  | TACCAGACTCAAAAAGATTAAAGAGATTGAGC |
| 13[160] | 14[144] | GAAAACCTCCAATCGCAAGACAAAATCGGTTG |
| 5[224]  | 7[223]  | AAAATTCATAATAACGGAATACCAGAGATAA  |
| 2[271]  | 0[272]  | CAGAACCGAACGGGGTCAGTGCCCTCCCTGCC |
| 16[207] | 14[208] | TTATTCATAAACAGTACATAAATCTCCGGCTT |
| 13[96]  | 15[95]  | AGGCAAGGAGCCTTTATTTCAACGCTATTTTT |
| 6[111]  | 4[112]  | CAGATGAAATCCGCGACCTGCTCCTACAGAGG |
| 11[128] | 13[127] | CTTAGAGCTGTTTTAAATATGCAATTAAGCAA |
| 23[192] | 22[208] | TAATCAGTGAGGCCACCGAGTAAATACCTACA |
| 2[143]  | 1[159]  | TCAACAGTGTATGGGATTTTGCTACAAATAAA |
| 18[239] | 16[240] | AAGTTTGATTGCACGTAACAGATTGCTTTG   |
| 10[239] | 8[240]  | GTACCGCAAGATTAGTTGCTATTTTTATCCCA |
| 4[207]  | 2[208]  | ACCATTACGCGGTTTTTCATCGGCGAGCCGCC |
| 2[175]  | 0[176]  | ACGATTGAAAAGCCAGAATGAAAAGTACCAG  |
| 0[207]  | 1[191]  | ATTAGGATTAGCGGGTTTTGCTCGCGCAGTC  |
| 17[96]  | 19[95]  | TAAATGTGTGCATCTGCCAGTTTGGGCGAAAG |
| 19[64]  | 21[63]  | GGCCTCTTCGTAATCATGGTCATACTAACTCA |
| 4[239]  | 2[240]  | TGGGAATCCCTTATTAGCGTTTGCACCCTCA  |
| 7[64]   | 9[63]   | TGGGCTTGTAGGAATACCACATTCATAGCGAG |

|         |         |                                                   |
|---------|---------|---------------------------------------------------|
| 19[256] | 21[255] | CAATAGATAAACAGAGGTGAGGCGGCTATTAG                  |
| 18[175] | 16[176] | ATATTCCTTCCTGATTGTTTGGATAAAGAAGA                  |
| 14[271] | 12[272] | AAGAGTCAACCGGAATCATAATTAATACAAAT                  |
| 12[207] | 10[208] | GCCAAACATCATGTTACAGTAATGCAAGCCGTT                 |
| 21[224] | 23[223] | TGGCACAGAAAACGCTCATGGAAAAGAGTCTG                  |
| 0[271]  | 1[255]  | TATTCGGAACCTATTATTCTGAAACTGGTAA                   |
| 3[96]   | 5[95]   | CTGAGGCTACTAAAGACTTTTTTCAGATAAATT                 |
| 4[271]  | 2[272]  | GTGAATTAATAATCACCGGAACCAGCCACCCT                  |
| 10[271] | 8[272]  | CCTTATCATTATCTGAATCTTATTGGCCAG                    |
| 23[128] | 23[159] | CAAAGGGCGAAAAACCGTCTATCAAGACAGGA                  |
| 20[239] | 18[240] | TAACACCGTAACAATAATAGATTAATTTTAA                   |
| 0[239]  | 1[223]  | GTATTAAGAGGCTGAGACTCCTCAGTCATACA                  |
| 10[207] | 8[208]  | TTTATTTTCGACTTGCGGGAGTTTTTAACGT                   |
| 3[192]  | 5[191]  | AGACTGTACATTAGCAAGGCCGAAAGACACC                   |
| 22[79]  | 20[80]  | TCACCGCCGCTTGCCTCACTGCGTACCGAG                    |
| 1[160]  | 2[144]  | TCCTCATTCTTGATTTACAAAAACAATT                      |
| 5[96]   | 8[95]   | GTGTGCAACGGTGTACAGACCAGGACTTTAATCATTGTGAATTACAGGT |
| 17[128] | 19[127] | TCCGTGGGTCACGTTGGTGTAGATGTTGGGTA                  |
| 8[207]  | 6[208]  | CAAAAATGTGAGCGCTAATATCAGCAAAAGAA                  |
| 7[32]   | 9[31]   | CCTGACGATAACGCCAAAAGGAATCCCTCGTT                  |
| 22[239] | 20[240] | CAACAGGAACAATATTTTTGAATGGTCAAGTAT                 |
| 22[47]  | 20[48]  | CGGTCCACGTGCCTAATGAGTGAGGCTGTTTC                  |
| 10[175] | 8[176]  | CAATAGCATCTAAGAACGCGAGGCCAGAGAGA                  |
| 16[271] | 14[272] | AGAAACAATAATTTCCCTTAGAAACGCTGAG                   |
| 13[32]  | 15[31]  | GCGAGCTGGAGTAATGTGTAGGTAGTCAAATC                  |
| 7[192]  | 9[191]  | AGGGTAATAAAATAGCAGCCTTAGTTTTAGC                   |
| 5[64]   | 7[63]   | CAACGGAGCCTTCATCAAGAGTAATAGTAAAT                  |
| 16[143] | 15[159] | ACGGTAATTGGAGCAAAACAAGAGAAAAATTAA                 |
| 0[175]  | 0[144]  | GCGGATAAGTGCCGTCGAGAGGGTTGATATAA                  |
| 13[192] | 15[191] | CATCTCTTTATATAACTATATGTTTACCTTT                   |
| 17[256] | 19[255] | AATTGCGTTTGCCCGAACGTTATTAGAGCCGT                  |
| 19[160] | 20[144] | ATATCTGGCCTCAAATATCAAACCCGTTGTAA                  |
| 2[111]  | 0[112]  | AACAACCTACGCTTTTCCAGACGTTCCGTACTC                 |
| 18[271] | 16[272] | TAAATCCTAGATTTTTCAGGTTTAAACATCGGG                 |
| 14[143] | 13[159] | TACCAAAACAGAGCATAAAGCTAAGAACGCGA                  |
| 12[47]  | 10[48]  | TTTGACCAGAACCAGACCGGAAGCAGCAAAGC                  |
| 19[32]  | 21[31]  | CTGCGCAAAATTGTTATCCGCTCAAAGTGTA                   |
| 9[64]   | 11[63]  | AGGCTTTTGACTATTATAGTCAGAAAACCCA                   |
| 0[47]   | 1[31]   | CCCTCATTTCAGGGATAGCAAGCTTCGTAC                    |
| 0[111]  | 1[95]   | AGGAGGTTTAGTACCGCCACCCTCCGATCTAA                  |
| 9[256]  | 11[255] | GCTACAATTTCCAAGAACGGGTATCCTGAACA                  |
| 16[239] | 14[240] | AATACCAATAACCTTGCTTCTGTAATCATAG                   |
| 8[47]   | 6[48]   | CAGATACAGAAACACCAGAACGAGTCTTGACA                  |
| 18[207] | 16[208] | AAGAAACCGGAAGGGTTAGAACCTGAGGCGAA                  |
| 23[224] | 22[240] | TCCATCACGCAAATTAACCGTTGTAGCCATTG                  |
| 21[32]  | 23[31]  | AGCCTGGGGCTGGTTTGCCCCAGCATCGGCAA                  |
| 13[64]  | 15[63]  | TAGTAGTATAGAACCCTCATATATTCTAGCTG                  |
| 17[160] | 18[144] | CAATATAAGATTATCAGATGATGGACCGTAAT                  |
| 9[192]  | 11[191] | GAACCTCCCATCGTAGGAATCATTGACGACA                   |
| 8[271]  | 6[272]  | TTACAAAAACAATGAAATAGCAATTAAGCAGA                  |
| 21[64]  | 23[63]  | CATTAATTTGGCCCTGAGAGAGTTGCCCGAGA                  |
| 23[32]  | 22[48]  | AATCCCTTATAAATCAAAGAATAGCAGCAAG                   |
| 17[32]  | 19[31]  | CCAATAGGTTTCCGGCACCGCTTCCATTCAAG                  |
| 1[64]   | 3[63]   | AGACAGCCAAAATCTCAAAAAAACAACAAC                    |
| 11[160] | 12[144] | AAAGGTAATAAGAGAATATAAAGATGCTGTA                   |
| 19[224] | 21[223] | AGGAGCACCTGCAACAGTGCCACAGAATACG                   |
| 4[111]  | 2[112]  | CTTTGAGGTGCAGGGAGTTAAAGGTAGAAAGG                  |



|         |         |                                                   |
|---------|---------|---------------------------------------------------|
| 12[239] | 10[240] | GGGCTTAATCAACAATAGATAAGTTAAACCAA                  |
| 17[224] | 19[223] | AAAATTATGTAACATTATCATTTTATATCTTT                  |
| 21[96]  | 23[95]  | CAGTCGGGAGACGGGCAACAGCTGGGAACAAG                  |
| 5[256]  | 7[255]  | AAAGGGCGCAAAGTTACCAGAAGGATAATAAG                  |
| 19[192] | 21[191] | AGGAATTGAAATGAAAAATCTAACAGAGATA                   |
| 0[79]   | 1[63]   | CACCCTCAGAACCGCCACCCTCAGCATTCCAC                  |
| 4[79]   | 2[80]   | TTTCATTACGCATAACCGATATATAATTTTT                   |
| 16[47]  | 14[48]  | TTGTAAACTATGATATTCAACCGTTTTAAATG                  |
| 4[175]  | 2[176]  | CAATGAAAAGAATCAAGTTTGCCTCAGGTCAG                  |
| 6[207]  | 4[208]  | CTGGCATGAGTTTATTTTGTACACCCAGTAGC                  |
| 14[239] | 12[240] | GTCTGAGATGTGATAAATAAGGCGCAACAGTA                  |
| 7[128]  | 9[127]  | TGGCTCATACTGTTAATAAAACGAAATAGCGTC                 |
| 21[160] | 22[144] | TAATAAAACAGATTACCCAGTCACAGGCGGTT                  |
| 8[239]  | 6[240]  | ATCCAAATAATTGAGTTAAGCCCAAACCGAG                   |
| 7[256]  | 9[255]  | AGCAAGAATAAACAGCCATATTATTGCACCCA                  |
| 6[239]  | 4[240]  | GAAACGCATATGGTTTACCAGCGCGAGCCATT                  |
| 6[79]   | 4[80]   | CTGGCTGAATTTGTATCATCGCCTTGAGGAAG                  |
| 14[175] | 12[176] | ATGCAAATTTTCAAATATATTTTACATTTTCG                  |
| 3[256]  | 5[255]  | TCATAATCTCACCGTCACCGACTTCAAAGACA                  |
| 12[111] | 10[112] | CGGTGTCTATAAGAGGTCATTTTTGTTTCAGAA                 |
| 12[143] | 11[159] | GCTCAACATTAATTGCTGAATATATACCGACA                  |
| 21[128] | 23[127] | ATGAATCGGGGCGCCAGGGTGGTTTCCAACGT                  |
| 10[95]  | 13[95]  | AATCAAAATTAATTGCTCCTTTTGGGAAGTTTCATTCCATAATCATAAC |
| 8[94]   | 24[81]  | AGAAAGACAGAGGGGTAATAGTTGACCATATTGTGCTACTCCAGTTC   |
| 15[224] | 24[207] | TGAGTGAAGTTACAAAATCGCGCAACCATATCTTGTGCTACTCCAGTTC |
| 3[224]  | 25[239] | TCATAGCCAGAGCCAGCAAAATCAATCAATAGTTGTGCTACTCCAGTTC |
| 3[64]   | 25[79]  | CATCGCCAAACGGGTAATAACGACAAAGTATTGTGCTACTCCAGTTC   |
| 9[144]  | 24[144] | TCATAAATAAGGCTTATCCGGTATAGCAAATCTTGTGCTACTCCAGTTC |
| 15[64]  | 24[47]  | ATAAATTAAGATTGTATAAGCAAAATTCGCGTTTGTGCTACTCCAGTTC |
|         |         |                                                   |
| 16[287] | 5[15]   | TACCTTTTCGTCAGATGAATATACACACTAAA                  |
| 20[287] | 9[15]   | CGAACGAACTAAAACATCGCCATTAGCAACAC                  |
| 22[287] | 11[15]  | TATCGGCCTTGCTGAGTAGAAGACAAATATC                   |
| 12[287] | 1[15]   | TATGCGTTCTAGAAAAAGCCTGTTTACCGTAA                  |
| 14[287] | 3[15]   | AGATTAAGTCCTTGAAAACATAGCGAGGTGAA                  |
| 18[287] | 7[15]   | ATTCGACATAGAAGTATTAGACTTGCTCATTC                  |
|         |         |                                                   |
| 18[287] | 19[15]  | ATTCGACATAGAAGTATTAGACTTGCAAAGCG                  |
| 21[16]  | 20[288] | GAAGCATACAATTCCACACAACATAAAAATAC                  |
| 22[287] | 23[15]  | TATCGGCCTTGCTGAGTAGAAGATGATGGTG                   |
| 20[287] | 21[15]  | CGAACGAACTAAAACATCGCCATTACGAGCCG                  |
| 23[16]  | 22[288] | GTTCCGAAAGGCGAAAATCCTGTTCTCAAAC                   |
| 19[16]  | 18[288] | CCATTGCTGGTGCCGAAACAGTACAAACA                     |
|         |         |                                                   |
| 0[287]  | 1[15]   | GTTAATGCTGAGTAACAGTGCCCGTACCGTAA                  |
| 2[287]  | 3[15]   | TCAGAGCCGAGCCACCACCGAACGAGGTGAA                   |
| 5[16]   | 4[288]  | ACACTCATAAAGAGGCAAAAGAATATTGACGG                  |
| 3[16]   | 2[288]  | TTTCTTAATTATCAGCTTGCTTTCCGCCTCCC                  |
| 1[16]   | 0[288]  | CACTGAGTCCAATAGGAACCCATGTATAAACA                  |
| 4[287]  | 5[15]   | AAATTATTGGGAGGGAAGGTAATAACTACTAAA                 |
|         |         |                                                   |
| 11[16]  | 22[288] | GCGTTTTAGAAGCCGAAAGACTTACTCAAAC                   |
| 1[16]   | 12[288] | CACTGAGTCCAATAGGAACCCATGTAGTATCA                  |
| 9[16]   | 20[288] | TATCATAATACGAGGCATAGTAAGAAAAATAC                  |
| 5[16]   | 16[288] | ACACTCATAAAGAGGCAAAAGAATAGTAACAG                  |
| 7[16]   | 18[288] | AGTGAATATCAACGTAACAAAGCTTACAAACA                  |
| 3[16]   | 14[288] | TTTCTTAATTATCAGCTTGCTTTTCGATAGCTT                 |

|         |         |                                   |
|---------|---------|-----------------------------------|
| 18[287] | 19[15]  | ATTCGACATAGAAGTATTAGACTTGCAAAGCG  |
| 19[16]  | 18[288] | CCATTGCTGGTGCCGAAACCAGTACAAACA    |
| 20[287] | 21[15]  | CGAACGAACTAAAACATCGCCATTACGAGCCG  |
| 21[16]  | 20[288] | GAAGCATAACAATTCCACACAACATAAAAATAC |
| 22[287] | 23[15]  | TATCGGCCTTGCTGAGTAGAAGATGATGGTG   |
| 23[16]  | 22[288] | GTTCCGAAAGGCGAAAATCCTGTTACTCAAAC  |
| 0[287]  | 1[15]   | GTTAATGCTGAGTAACAGTGCCCGTACCGTAA  |
| 1[16]   | 0[288]  | CACTGAGTCCAATAGGAACCCATGTATAAACA  |
| 2[287]  | 3[15]   | TCAGAGCCGAGCCACCACCGAACGAGGTGAA   |
| 3[16]   | 2[288]  | TTTCTTAATTATCAGCTTGCTTCCGCCTCCC   |
| 4[287]  | 5[15]   | AAATTATTGGGAGGGAAGGTAATACTACTAAA  |
| 5[16]   | 4[288]  | ACACTCATAAAGAGGCAAAAGAATATTGACGG  |
|         |         |                                   |
|         |         |                                   |
| 2[287]  | 3[15]   | TCAGAGCCGAGCCACCACCGAACGAGGTGAA   |
| 3[16]   | 2[288]  | TTTCTTAATTATCAGCTTGCTTCCGCCTCCC   |
|         |         |                                   |
| 20[287] | 21[15]  | CGAACGAACTAAAACATCGCCATTACGAGCCG  |
| 21[16]  | 20[288] | GAAGCATAACAATTCCACACAACATAAAAATAC |

## Supplementary note 11: Analysis of computational predictions

We compared our microscopic observations with structural predictions using two available tools. We fed HOTAIR and RANDOM (see **Supplementary note 5**) into Mfold<sup>10</sup> and RNAfold<sup>11</sup>, using their default prediction parameters. Mfold yielded 28 and 30 predicted secondary structures for HOTAIR and RANDOM, respectively, with average minimum free energy (MFE) of  $-697.93 \pm 5.99$  kcal/mol for HOTAIR. The shape range for both sequences included shapes resembling the observed anatomy as well as more remote ones. RNAfold retrieved a single structure for each sequence (MFE -668 kcal/mol for HOTAIR and -632 kcal/mol for RANDOM). However, difference between predictions, and similarity between observed and predicted HOTAIR, were not conclusive. We therefore chose not to rely on these predictions for our understanding of the global structure of HOTAIR. Nevertheless, some strictly-local predictions (e.g. lengths of stems and loops) were used as assumptions in certain aspects of our modeling approach.

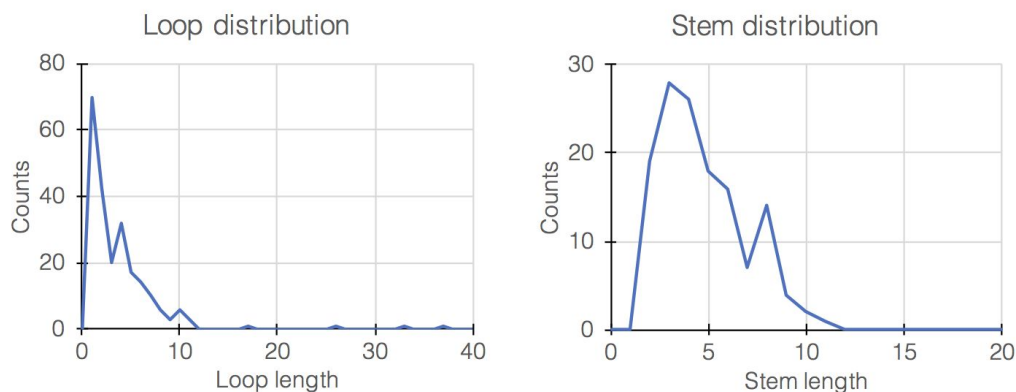

**Figure S13.** Distribution of stem and loop sizes in HOTAIR predicted by Mfold.

**(On next page) Figure S14.** Predicted minimum free energy configurations of HOTAIR and a random sequence generated from HOTAIR (same base composition, same length, scrambled sequence). A, HOTAIR. B, Random.

**A**

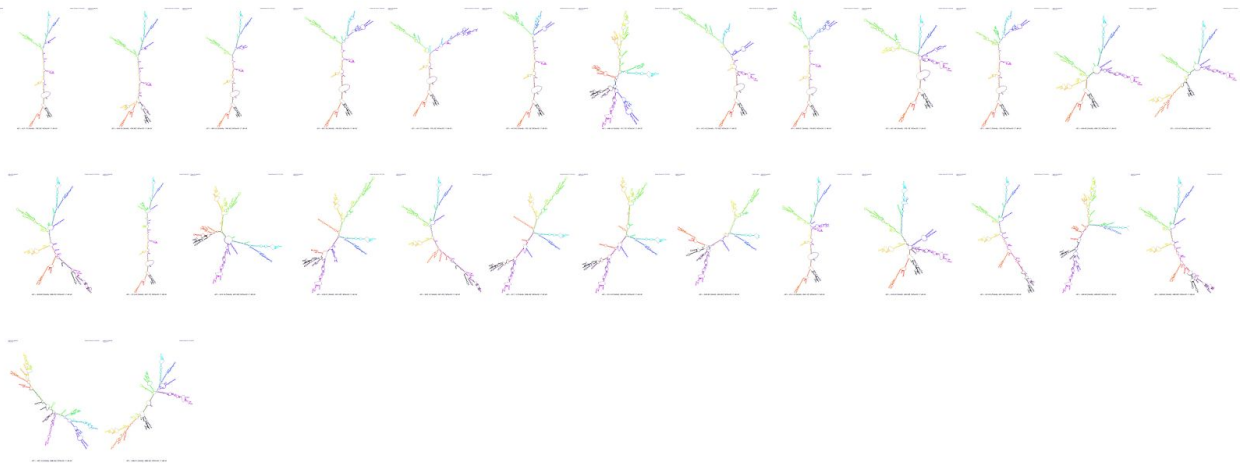

**B**

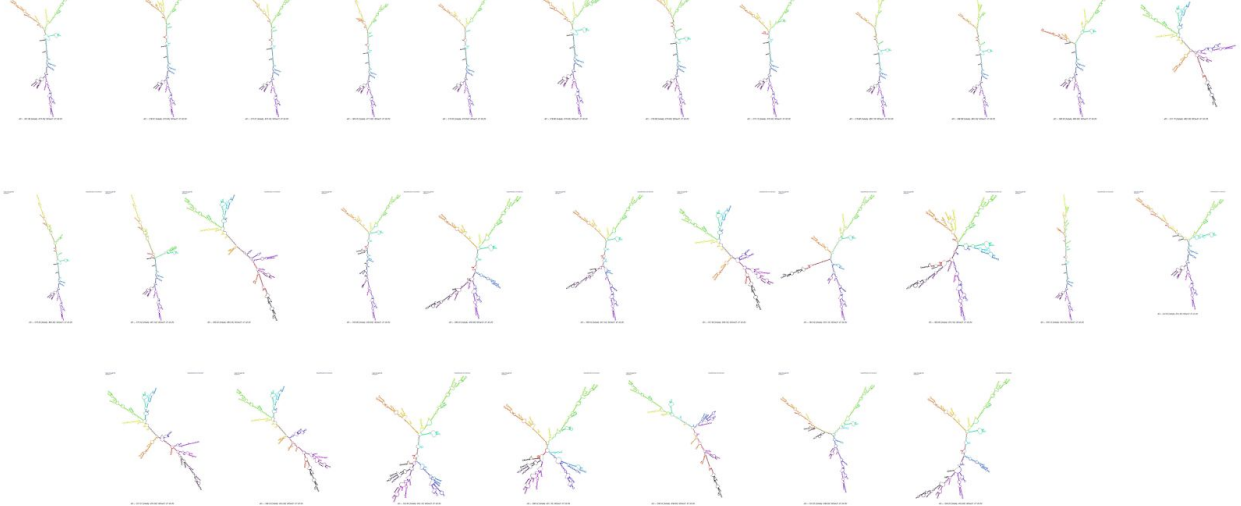

## References

1. Li, H. & Durbin, R. Fast and accurate short read alignment with Burrows-Wheeler transform. *Bioinformatics* **25**, 1754–1760 (2009).
2. Li, H. *et al.* The Sequence Alignment/Map format and SAMtools. *Bioinformatics* **25**, 2078–2079 (2009).
3. Mastronarde, D. N. Automated electron microscope tomography using robust prediction of specimen movements. *J. Struct. Biol.* **152**, 36–51 (2005).
4. Li, X. *et al.* Electron counting and beam-induced motion correction enable near-atomic-resolution single-particle cryo-EM. *Nat. Methods* **10**, 584–590 (2013).
5. Tang, G. *et al.* EMAN2: an extensible image processing suite for electron microscopy. *J. Struct. Biol.* **157**, 38–46 (2007).
6. Scheres, S. H. W. RELION: implementation of a Bayesian approach to cryo-EM structure determination. *J. Struct. Biol.* **180**, 519–530 (2012).
7. Chu, C., Qu, K., Zhong, F. L., Artandi, S. E. & Chang, H. Y. Genomic maps of long noncoding RNA occupancy reveal principles of RNA-chromatin interactions. *Mol. Cell* **44**, 667–678 (2011).
8. Buske, F. A., Bauer, D. C., Mattick, J. S. & Bailey, T. L. Triplexator: detecting nucleic acid triple helices in genomic and transcriptomic data. *Genome Res.* **22**, 1372–1381 (2012).
9. Rothmund, P. W. K. Folding DNA to create nanoscale shapes and patterns. *Nature* **440**, 297–302 (2006).
10. Zuker, M. Mfold web server for nucleic acid folding and hybridization prediction. *Nucleic Acids Res.* **31**, 3406–3415 (2003).
11. Lorenz, R. *et al.* ViennaRNA Package 2.0. *Algorithms Mol. Biol.* **6**, 26 (2011).
